# Supplementary material for: Examination of Demographic Characteristics of Drug and Corrosive Poisonings, Morbidity and Mortality in Children in terms of Emergency Department and Pediatric Surgery
Source: Preprints.org preprint supplement (doi:10.20944/preprints202002.0154.v1), 2020-02-11
Supplement: Supplementary file 1 [file supplementary]

**Title Page:**

**Examination of Demographic Characteristics of Drug and Corrosive Poisonings,  
Morbidity and Mortality in Children in terms of Emergency Department and  
Pediatric Surgery**

**Running title:**

**“Examination of Demographic Characteristics of Drug and Corrosive Substance  
Intoxication in Children”**

**<sup>1</sup>Cengiz Güney, Assoc. Professor; <sup>2</sup>\*Abuzer Coskun, MD**

<sup>1</sup>Cumhuriyet University Medical Faculty, Department of Pediatric Surgery, Sivas,  
58140,Turkey

<sup>2</sup>Sivas Numune Hospital, Department of Emergency, Sivas, 58030, Turkey

**Corresponding Author:**

**\*Abuzer Coskun, MD**

**Sivas Numune Hospital, Department of Emergency**

**Yesilyurt Mah. Sifa Street Sivas, 58030, Turkey**

**Telephone: + 90 444 44 58 Fax: + 90 346 223 95 30 Mobile: +90 532 157 79 12**

**E-mail: [dr.acoskun44@hotmail.com](mailto:dr.acoskun44@hotmail.com)**

**- Acknowledgements:** None declared

**- Authorship:** The conception and design of the work; the acquisition, analysis, and interpretation of data for the work; drafting the work and revising it critically for important intellectual content; and final approval of the manuscript was done by Abuzer Coşkun, MD, and Cengiz Güney, Assoc.Prof,

**- Funding:** None declared.

**- Availability of data and materials:** All data is available on request without restriction.

**- Conflict of interest:** None declared.

**- Informed consent:** Written informed consent was not necessary because the study was performed retrospectively by screening patient files.

**- Ethical approval:** The study was approved by the institutional review board.

**- Human rights:** The study was made in following the Declaration of Helsinki for Human

Research.

## Lokal Ethics:

|                                                                                   |                                                                                                |
|-----------------------------------------------------------------------------------|------------------------------------------------------------------------------------------------|
|  | <b>CUMHURİYET ÜNİVERSİTESİ GİRİŞİMSSEL OLMAYAN KLİNİK ARAŞTIRMALAR ETİK KURULU KARAR FORMU</b> |
|-----------------------------------------------------------------------------------|------------------------------------------------------------------------------------------------|

|                       |                                                                                                       |
|-----------------------|-------------------------------------------------------------------------------------------------------|
| ARAŞTIRMANIN AÇIK ADI | Çocuklarda kostik madde (Yakıcı ve Aşındırıcı) ve ilaç intoksikasyonunun (zehirlenme) epidemiyolojisi |
|-----------------------|-------------------------------------------------------------------------------------------------------|

| DEĞERLENDİRİLEN BELGELER       | Belge Adı                                                                                                                                                                                                                                                                                                                                                                                                                   | Tarihi                   | Versiyon Numarası | Dili                                                                                                         |
|--------------------------------|-----------------------------------------------------------------------------------------------------------------------------------------------------------------------------------------------------------------------------------------------------------------------------------------------------------------------------------------------------------------------------------------------------------------------------|--------------------------|-------------------|--------------------------------------------------------------------------------------------------------------|
|                                | ARAŞTIRMA PROTOKOLÜ                                                                                                                                                                                                                                                                                                                                                                                                         |                          |                   | Türkçe <input checked="" type="checkbox"/> İngilizce <input type="checkbox"/> Diğer <input type="checkbox"/> |
|                                | BİLGİLENDİRİLMİŞ GÖNÜLLÜ OLUR FORMU                                                                                                                                                                                                                                                                                                                                                                                         |                          |                   | Türkçe <input checked="" type="checkbox"/> İngilizce <input type="checkbox"/> Diğer <input type="checkbox"/> |
|                                | OLGU RAPOR FORMU                                                                                                                                                                                                                                                                                                                                                                                                            |                          |                   | Türkçe <input type="checkbox"/> İngilizce <input type="checkbox"/> Diğer <input type="checkbox"/>            |
| DEĞERLENDİRİLEN DİĞER BELGELER | Belge Adı                                                                                                                                                                                                                                                                                                                                                                                                                   | Açıklama                 |                   |                                                                                                              |
|                                | SİGORTA                                                                                                                                                                                                                                                                                                                                                                                                                     | <input type="checkbox"/> |                   |                                                                                                              |
|                                | ARAŞTIRMA BÜTÇESİ                                                                                                                                                                                                                                                                                                                                                                                                           | <input type="checkbox"/> |                   |                                                                                                              |
|                                | BİYOLOJİK MATERYEL TRANSFER FORMU                                                                                                                                                                                                                                                                                                                                                                                           | <input type="checkbox"/> |                   |                                                                                                              |
|                                | İLAN                                                                                                                                                                                                                                                                                                                                                                                                                        | <input type="checkbox"/> |                   |                                                                                                              |
|                                | YILLIK BİLDİRİM                                                                                                                                                                                                                                                                                                                                                                                                             | <input type="checkbox"/> |                   |                                                                                                              |
|                                | SONUÇ RAPORU                                                                                                                                                                                                                                                                                                                                                                                                                | <input type="checkbox"/> |                   |                                                                                                              |
| KARAR BİLGİLERİ                | Karar No: 2019-07/27                                                                                                                                                                                                                                                                                                                                                                                                        | Tarih: 04.07.2019        |                   |                                                                                                              |
|                                | Yukarıda bilgileri verilen başvuru dosyası ile ilgili belgeler araştırmanın/çalışmanın gerekçe, amaç, yaklaşım ve yöntemleri dikkate alınarak incelenmiş ve uygun bulunmuş olup araştırmanın/çalışmanın başvuru dosyasında belirtilen merkezlerden gerekli izin alınarak gerçekleştirilmesinde etik ve bilimsel sakınca bulunmadığına toplantıya katılan etik kurul üye tam sayısının salt çoğunluğu ile karar verilmiştir. |                          |                   |                                                                                                              |

| KLİNİK ARAŞTIRMALAR ETİK KURULU |                                                                                                                                                                                     |
|---------------------------------|-------------------------------------------------------------------------------------------------------------------------------------------------------------------------------------|
| ETİK KURULUN ÇALIŞMA ESASI      | Klinik Araştırmalar Hakkında Yönetmelik, İyi Klinik Uygulamaları Kılavuzu, Helsinki Bildirgesi, Cumhuriyet Üniversitesi Girişimsel Olmayan Klinik Araştırmalar Etik Kurul Yönergesi |
| BASKANIN UNVANI / ADI / SOYADI: | Prof. Dr. Muhittin Sönmez                                                                                                                                                           |

| Unvanı/Adı/Soyadı              | Uzmanlık Alanı           | Kurumu                                                    | Cinsiyet                                                         | Araştırma ile İlişki                                             | Katılım *                                                        | İmza                                                                                  |
|--------------------------------|--------------------------|-----------------------------------------------------------|------------------------------------------------------------------|------------------------------------------------------------------|------------------------------------------------------------------|---------------------------------------------------------------------------------------|
| Prof. Dr. Muhittin Sönmez      | Anatomi                  | Sivas Cumhuriyet Üniversitesi, Tıp Fakültesi              | E <input checked="" type="checkbox"/> K <input type="checkbox"/> | E <input type="checkbox"/> H <input checked="" type="checkbox"/> | E <input checked="" type="checkbox"/> H <input type="checkbox"/> |  |
| Prof. Dr. Yalçın Karagöz       | Biyoistatistik           | Sivas Cumhuriyet Üniversitesi, Tıp Fakültesi              | E <input checked="" type="checkbox"/> K <input type="checkbox"/> | E <input type="checkbox"/> H <input checked="" type="checkbox"/> | E <input type="checkbox"/> H <input checked="" type="checkbox"/> |  |
| Doç. Dr. Hatice Özer           | Patoloji                 | Sivas Cumhuriyet Üniversitesi, Tıp Fakültesi              | E <input type="checkbox"/> K <input checked="" type="checkbox"/> | E <input type="checkbox"/> H <input checked="" type="checkbox"/> | E <input type="checkbox"/> H <input checked="" type="checkbox"/> |  |
| Doç. Dr. Ercan Özdemir         | Fizyoloji                | Sivas Cumhuriyet Üniversitesi, Tıp Fakültesi              | E <input checked="" type="checkbox"/> K <input type="checkbox"/> | E <input type="checkbox"/> H <input checked="" type="checkbox"/> | E <input checked="" type="checkbox"/> H <input type="checkbox"/> |  |
| Doç. Dr. Gülay Yıldırım        | Tıp Tarihi ve Etik       | Sivas Cumhuriyet Üniversitesi, Tıp Fakültesi              | E <input type="checkbox"/> K <input checked="" type="checkbox"/> | E <input type="checkbox"/> H <input checked="" type="checkbox"/> | E <input type="checkbox"/> H <input checked="" type="checkbox"/> |  |
| Doç. Dr. Binnur Bağcı          | Beslenme ve Diyetetik    | Sivas Cumhuriyet Üniversitesi, Sağlık Bilimleri Fakültesi | E <input type="checkbox"/> K <input checked="" type="checkbox"/> | E <input type="checkbox"/> H <input checked="" type="checkbox"/> | E <input checked="" type="checkbox"/> H <input type="checkbox"/> |  |
| Dr. Öğr. Üyesi Mehmet Ataş     | Farmasötik Mikrobiyoloji | Sivas Cumhuriyet Üniversitesi, Eczacılık Fakültesi        | E <input checked="" type="checkbox"/> K <input type="checkbox"/> | E <input type="checkbox"/> H <input checked="" type="checkbox"/> | E <input checked="" type="checkbox"/> H <input type="checkbox"/> |  |
| Dr. Öğr. Üyesi Engin Altunkaya | İç hastalıkları          | Sivas Cumhuriyet Üniversitesi, Tıp Fakültesi              | E <input checked="" type="checkbox"/> K <input type="checkbox"/> | E <input type="checkbox"/> H <input checked="" type="checkbox"/> | E <input type="checkbox"/> H <input checked="" type="checkbox"/> |  |
| Dr. Öğr. Üyesi Melih Ülgey     | Protetik Diş Tedavisi    | Sivas Cumhuriyet Üniversitesi, Diş Hekimliği Fakültesi    | E <input checked="" type="checkbox"/> K <input type="checkbox"/> | E <input type="checkbox"/> H <input checked="" type="checkbox"/> | E <input checked="" type="checkbox"/> H <input type="checkbox"/> |  |

\*: Toplantıda bulunma

Etik Kurul Başkanının  
Unvanı/Adı/Soyadı: Prof. Dr. Muhittin Sönmez  
İmza:
